# Supplementary material
Source: PubMed Central journal article supplement (PMC10967655)
Supplement: NIHMS1969288-supplement-supplementary_material.pdf [file NIHMS1969288-supplement-supplementary_material.pdf]

Impact of Hepatopulmonary Syndrome in Liver Transplantation Candidates  
and the Role of Angiogenesis

Running title:

Hepatopulmonary Syndrome and Outcomes

Steven M. Kawut, MD, MS,<sup>1,2</sup> Michael J. Krowka, MD,<sup>4</sup> Kimberly A. Forde, MD PhD,<sup>1,2</sup> Nadine Al-Naamani, MD, MS,<sup>1</sup> Karen L. Krok, MD,<sup>5</sup> Mamta Patel, RN, BSN,<sup>1,2</sup> Carlo R. Bartoli, MD, PhD,<sup>3,6</sup> Margaret Doyle, PhD,<sup>7</sup> Jude Moutchia, MS,<sup>2</sup> Grace Lin, MD,<sup>4</sup> Jae K. Oh, MD,<sup>4</sup> Carl D. Mottram, RRT,<sup>4</sup> Paul D. Scanlon, MD,<sup>4</sup> and Michael B. Fallon, MD<sup>8</sup>  
for the Pulmonary Vascular Complications of Liver Disease Study Group

**Online Data Supplement**

## Supplemental Methods

### vWF Assays

#### *Gel Electrophoresis and Immunoblotting to Quantify vWF Multimers and Fragments*

High-molecular-weight plasma vWF multimers and vWF degradation fragments were resolved by standard vertical gel electrophoresis and immunoblotting techniques as previously described in detail.<sup>1-4</sup> To resolve multimers, plasma was diluted in NuPAGE LDS Sample Buffer (Invitrogen, Carlsbad, CA), heated, and loaded into vertical 1% agarose-SDS gels. Electrophoresis was performed in Tris-Acetate SDS running buffer (Invitrogen) in an XCell SureLock Mini-Cell Electrophoresis System (Invitrogen).

Proteins were transferred to PVDF using the iBlot dry transfer device (Invitrogen). Membranes were blocked and incubated with rabbit anti-human vWF primary antibody (1:500, Dako, Carpinteria, CA) overnight. Membranes were incubated with goat anti-rabbit IgG horseradish peroxidase (HRP)-conjugated secondary antibody (1:3,000, Cell Signaling, Danvers, MA), developed with Luminata Forte Western Blot HRP Substrate (Millipore, Billerica, MA), and imaged with an ImageQuant LAS 4000 (GE Healthcare, Piscataway, NJ).

To resolve vWF degradation fragments, plasma was diluted in NuPAGE LDS Sample Buffer (Invitrogen), heated, and loaded into vertical NuPAGE 3-8% Tris-Acetate Polyacrylamide gels (Invitrogen). Electrophoresis was performed in Tris-Acetate SDS running buffer (Invitrogen). Protein was transferred, blocked, probed for vWF, and imaged as described above. As a loading control, each membrane was probed for human plasma albumin with a goat anti-human albumin HRP-conjugated antibody (1:10,000 Abcam, Cambridge, MA).

#### *Quantification of Plasma vWF Multimers and vWF Degradation Fragments*

Study patient plasma samples were blotted in adjacent lanes to a pooled control sample from healthy volunteer blood donors (n=20). High-molecular-weight vWF multimers were quantified as

percent difference in total length of the vWF multimer profile versus the pooled control as described in detail.<sup>5</sup> The density of low-molecular-weight vWF multimers and vWF degradation fragments was quantified as the mean difference in density of all multimers or all vWF degradation fragments in HPS and non-HPS versus the pooled control. ImageQuantTL (GE Healthcare) and ImageJ (National Institutes of Health) were used to generate and analyse densitometric plots, respectively.

#### *vWF:Collagen Binding Activity*

vWF:collagen binding activity was determined with via ELISA (Technozym, vWF:CBA ELISA, Technoclone, Vienna Austria). Plasma samples were incubated with wells coated with human collagen III. An HRP-conjugated polyclonal anti-vWF antibody was co-incubated in solution and bound the vWF-collagen III complex. Tetramethylbenzidine reagent was added to elicit a colorimetric reaction that was quenched with a stopping solution. A standard curve was constructed from reference plasma samples with known vWF concentrations. vWF:collagen binding activity was determined by interpolation of the colorimetric intensity values from the standard curve.

#### *Quantification of Plasma ADAMTS-13*

Plasma ADAMTS-13, the vWF-specific protease, was measured with a quantitative solid-phase sandwich-based ELISA (R&D Systems, Minneapolis, MN). Briefly, plasma samples were added to wells coated with a monoclonal anti-human ADAMTS-13 antibody. Wells were incubated with HRP-conjugated polyclonal anti-human ADAMTS-13. Tetramethylbenzidine was added to elicit a colorimetric reaction that was quantified with spectrophotometry by a microplate reader ( $\mu$ Quant, Bio-Tek Instruments, Highland Park, VT). Data were analysed with Gen5, version 2.05 (Bio-Tek). Plasma ADAMTS-13 values were interpolated from a standard curve.

## Flow Cytometry

Heparinized whole blood was shipped overnight to the University of Vermont Laboratory for Clinical Biochemistry Research using temperature controlled (15-30°C) shipping containers. Peripheral blood mononuclear cells (PBMCs) were isolated by density gradient centrifugation and cells were washed to remove platelet contamination. PBMCs ( $10^6$  cells) were labelled with PeCy5.5 anti CD45 (Invitrogen Cat#MHCD4518), FITC anti-CD34 (BD Cat# 555821), PE anti-KDR (VEGFR2) (R&D Cat# FAG357P) and APC anti-CD133 (Miltenyi Cat# 130-90-826), or with appropriate isotype controls. Contaminating RBCs were lysed and the cells fixed with 1% paraformaldehyde. Samples were analysed on a MacsQuant 10 (Miltenyi Biotech) using the MacsQuantify software. Single colour controls were used for machine compensation and negative gates were set with isotype controls. We focused on hematopoietic progenitor cells defined by CD34+, CD34+CD133+ and CD34+CD133+KDR+, which were CD45dim (expressed as % of peripheral blood mononuclear cells) and intermediate class (M2) monocytes and TIE2-expressing M2 monocytes (CD14+CD16+ and CD14+CD16+TIE2+), both expressed as percent of CD14+ cells.

**Table E1: Comparison between study sample and excluded subjects**

| <b>Variable</b>                                               | <b>N</b> | <b>Non-missing<br/>(N=231)</b> | <b>Missing<br/>(N=180)</b> | <b>Standardized<br/>difference</b> |
|---------------------------------------------------------------|----------|--------------------------------|----------------------------|------------------------------------|
| Age (years), mean $\pm$ SD                                    | 411      | 56.7 $\pm$ 9.1                 | 56.1 $\pm$ 9.4             | 0.06                               |
| Female gender, n (%)                                          | 411      | 73 (31.6)                      | 72 (40.0)                  | 0.18                               |
| Race/Ethnicity, n (%)                                         | 411      |                                |                            | 0.14                               |
| Non-Hispanic white                                            |          | 165 (71.4)                     | 133 (73.9)                 |                                    |
| Hispanic white                                                |          | 41 (17.7)                      | 24 (13.3)                  |                                    |
| Non-Hispanic black                                            |          | 18 (7.8)                       | 18 (10.0)                  |                                    |
| Other                                                         |          | 7 (3.0)                        | 5 (2.8)                    |                                    |
| Body mass index (kg/m <sup>2</sup> )                          | 407      | 31 $\pm$ 7                     | 30 $\pm$ 7                 | 0.04                               |
| Education, n (%)                                              | 410      |                                |                            | 0.38                               |
| No schooling or Grades 1-11                                   |          | 35 (15.2)                      | 12 (6.7)                   |                                    |
| High school or GED                                            |          | 68 (29.6)                      | 59 (32.8)                  |                                    |
| Some college education or<br>Technical/Vocational certificate |          | 43 (18.7)                      | 54 (30.0)                  |                                    |
| Associate or Bachelor's degree                                |          | 68 (29.6)                      | 41 (22.8)                  |                                    |
| Professional or Graduate degree                               |          | 16 (7.0)                       | 14 (7.8)                   |                                    |
| Etiology of liver disease, n (%)                              |          |                                |                            |                                    |
| Alcohol                                                       | 411      | 82 (35.5)                      | 80 (44.4)                  | 0.18                               |
| Hepatitis C infection                                         | 411      | 99 (42.9)                      | 62 (34.4)                  | 0.17                               |
| Autoimmune hepatitis                                          | 411      | 10 (4.3)                       | 6 (3.3)                    | 0.05                               |
| Non-alcoholic fatty liver disease                             | 411      | 53 (22.9)                      | 41 (22.8)                  | 0.0                                |
| Hepatitis B infection                                         | 411      | 7 (3.0)                        | 1 (0.6)                    | 0.19                               |
| Primary sclerosing cholangitis                                | 411      | 12 (5.2)                       | 6 (3.3)                    | 0.09                               |
| Primary biliary cirrhosis                                     | 411      | 15 (6.5)                       | 11 (6.1)                   | 0.02                               |
| Cryptogenic cirrhosis                                         | 411      | 14 (6.1)                       | 7 (3.9)                    | 0.1                                |
| Other                                                         | 411      | 11 (4.8)                       | 12 (6.7)                   | 0.08                               |
| MELD-Na score, median [IQR]                                   | 411      | 14.0 [10.5, 18.0]              | 13.5 [10.0, 18.2]          | 0.06                               |
| History of liver disease complications, n (%)                 |          |                                |                            |                                    |
| Ascites                                                       | 411      | 155 (67.1)                     | 131 (72.8)                 | 0.12                               |
| Varices                                                       | 411      | 157 (68.0)                     | 123 (68.3)                 | 0.01                               |
| Variceal bleeding                                             | 411      | 71 (30.7)                      | 62 (34.4)                  | 0.08                               |
| Encephalopathy                                                | 411      | 128 (55.4)                     | 111 (61.7)                 | 0.13                               |
| Multiple paracenteses                                         | 411      | 73 (31.6)                      | 68 (37.8)                  | 0.13                               |
| Spontaneous bacterial peritonitis (SBP)                       | 411      | 12 (5.2)                       | 14 (7.8)                   | 0.1                                |
| Hepatocellular carcinoma                                      | 411      | 80 (34.6)                      | 47 (26.1)                  | 0.19                               |

|                                                   |     |            |            |      |
|---------------------------------------------------|-----|------------|------------|------|
| Hepatic hydrothorax                               | 411 | 23 (10.0)  | 29 (16.1)  | 0.18 |
| Transjugular intrahepatic porto-systemic shunt    | 411 | 19 (8.2)   | 15 (8.3)   | 0.0  |
| Smoked at least 100 cigarettes in lifetime, n (%) | 410 | 135 (58.7) | 115 (63.9) | 0.11 |
| Pack-years for ever-smokers, median [IQR]         | 182 | 13 [4, 30] | 15 [7, 35] | 0.17 |
| Smoked in the last 30 days, n (%)                 | 411 | 29 (12.6)  | 38 (21.1)  | 0.23 |
| Consumed alcohol, n (%)                           | 410 | 214 (93.0) | 165 (91.7) | 0.05 |

---

Standardized Difference- Difference in means, ranks, or proportions divided by the standard deviation.  
Standardized differences > 0.20 may suggest imbalance.

**Table E2: Angiogenesis biomarkers**

| Variable                                       | N   | HPS<br>(N=85)    | No HPS<br>(N=146) | $\beta$ (95% CI)        | p value | a $\beta$ (95% CI)*    | P<br>value |
|------------------------------------------------|-----|------------------|-------------------|-------------------------|---------|------------------------|------------|
| VEGF (ng/ml)                                   | 222 | 1.0 $\pm$ 2.1    | 0.8 $\pm$ 1.8     | 0.17 (-0.35, 0.7)       | 0.51    | 0.19 (-0.34, 0.72)     | 0.48       |
| VEGFR-1 (ng/ml)                                | 222 | 0.4 $\pm$ 0.5    | 0.4 $\pm$ 0.8     | -0.06 (-0.26, 0.14)     | 0.55    | -0.04 (-0.24, 0.17)    | 0.73       |
| VEGFR-2 (ng/ml)                                | 222 | 9.6 $\pm$ 3.7    | 11.1 $\pm$ 10.8   | -1.45 (-3.92, 1.03)     | 0.25    | -1.22 (-3.74, 1.3)     | 0.34       |
| VEGFR-3 (ng/ml)                                | 222 | 6.0 $\pm$ 9.6    | 9.0 $\pm$ 42.9    | -3.06 (-12.7, 6.58)     | 0.53    | -1.73 (-11.52, 8.06)   | 0.73       |
| Fractalkine (ng/ml)                            | 222 | 0.6 $\pm$ 1.1    | 0.5 $\pm$ 0.7     | 0.12 (-0.12, 0.36)      | 0.34    | 0.11 (-0.13, 0.36)     | 0.37       |
| Angiostatin (ng/ml)                            | 222 | 9.3 $\pm$ 17.0   | 24.8 $\pm$ 85.7   | -15.53 (-34.76, 3.69)   | 0.11    | -11.29 (-30.62, 8.05)  | 0.25       |
| Endostatin (ng/ml)                             | 222 | 145.7 $\pm$ 89.5 | 160.0 $\pm$ 89.5  | -14.29 (-39.01, 10.44)  | 0.26    | -17.78 (-42.81, 7.25)  | 0.16       |
| Tie-2 (ng/ml)                                  | 222 | 23.3 $\pm$ 8.5   | 20.1 $\pm$ 9.2    | 3.2 (0.73, 5.67)        | 0.01    | 2.26 (-0.12, 4.64)     | 0.06       |
| c-KIT (ng/ml)                                  | 222 | 39.1 $\pm$ 16.9  | 32.6 $\pm$ 14.8   | 6.47 (2.17, 10.76)      | 0.01    | 5.55 (1.22, 9.88)      | 0.01       |
| EGFR (ng/ml)                                   | 222 | 1.7 $\pm$ 1.1    | 1.9 $\pm$ 3.0     | -0.25 (-0.92, 0.43)     | 0.47    | -0.13 (-0.81, 0.56)    | 0.71       |
| E-selectin (ng/ml)                             | 222 | 94.4 $\pm$ 44.2  | 111.3 $\pm$ 55.7  | -16.91 (-31.26, -2.57)  | 0.02    | -16.78 (-31.18, -2.39) | 0.02       |
| PCAM-1 (ng/ml)                                 | 222 | 9.7 $\pm$ 3.7    | 9.2 $\pm$ 5.5     | 0.51 (-0.86, 1.87)      | 0.47    | 0.23 (-1.14, 1.6)      | 0.74       |
| Tenascin C (ng/ml)                             | 222 | 27.6 $\pm$ 15.0  | 22.3 $\pm$ 12.5   | 5.3 (1.59, 9.01)        | 0.01    | 4.23 (0.58, 7.89)      | 0.02       |
| PDGF-AB/BB (ng/ml)                             | 222 | 0.2 $\pm$ 0.4    | 0.6 $\pm$ 1.5     | -0.33 (-0.68, 0.02)     | 0.07    | -0.31 (-0.67, 0.04)    | 0.08       |
| Angiopoietin-2 (ng/ml)                         | 222 | 21.5 $\pm$ 15.5  | 15.1 $\pm$ 10.5   | 6.39 (2.95, 9.84)       | <0.001  | 4.56 (1.43, 7.7)       | 0.005      |
| VCAM-1 (ng/ml)                                 | 222 | 3,118 $\pm$ 452  | 2,731 $\pm$ 774   | 387.46 (200.29, 574.63) | <0.001  | 289.1 (124.58, 453.63) | 0.001      |
| vWF antigen (%)                                | 222 | 537 $\pm$ 213    | 430 $\pm$ 189     | 106.56 (51.87, 161.25)  | <0.001  | 82.88 (32.75, 133.01)  | 0.001      |
| High-molecular-weight vWF multimers (% change) | 100 | 119 $\pm$ 103    | 95 $\pm$ 92       | 24 (-14.96, 62.96)      | 0.22    | 13.96 (-24.9, 52.83)   | 0.48       |
| Low-molecular-weight vWF multimers (% change)  | 100 | 161 $\pm$ 94     | 112 $\pm$ 90      | 49.62 (12.37, 86.86)    | 0.01    | 37.93 (1.31, 74.54)    | 0.04       |
| vWF Degradation Fragments (% change)           | 100 | 174 $\pm$ 104    | 121 $\pm$ 90      | 53.39 (14.62, 92.15)    | 0.007   | 41.06 (3.65, 78.47)    | 0.03       |
| vWF:Collagen Binding (IU/ml)                   | 100 | 4.5 $\pm$ 1.5    | 3.7 $\pm$ 1.4     | 0.8 (0.21, 1.38)        | 0.008   | 0.6 (0.03, 1.18)       | 0.04       |
| ADAMTS-13 (IU/ml)                              | 100 | 0.5 $\pm$ 0.3    | 0.7 $\pm$ 0.6     | -0.15 (-0.37, 0.07)     | 0.18    | -0.13 (-0.35, 0.1)     | 0.26       |
| Flow cytometry                                 |     |                  |                   |                         |         |                        |            |
| CD34+CD45dim, % of PBMCs                       | 194 | 0.5 $\pm$ 0.4    | 0.5 $\pm$ 0.4     | 0.04 (-0.07, 0.15)      | 0.48    | 0.05 (-0.06, 0.17)     | 0.38       |
| CD133+CD45dim, % of PBMCs                      | 194 | 4.1 $\pm$ 2.6    | 4.5 $\pm$ 3.2     | -0.43 (-1.3, 0.45)      | 0.34    | -0.56 (-1.45, 0.33)    | 0.21       |
| CD34+CD133+CD45dim, % of PBMCs                 | 194 | 20.9 $\pm$ 18.6  | 20.1 $\pm$ 16.2   | 0.78 (-4.26, 5.81)      | 0.76    | 1.28 (-3.82, 6.38)     | 0.62       |

|                                                     |     |            |            |                     |      |                     |      |
|-----------------------------------------------------|-----|------------|------------|---------------------|------|---------------------|------|
| CD34+CD133+K<br>DR+CD4dim, %<br>of PBMCs            | 194 | 2.2 ± 2.7  | 2.3 ± 3.4  | -0.11 (-1.03, 0.81) | 0.81 | -0.01 (-0.94, 0.92) | 0.98 |
| CD14++CD16+,<br>% of CD14+ cells<br>PBMCs           | 198 | 13.5 ± 8.6 | 12.4 ± 9.1 | 1.02 (-1.59, 3.64)  | 0.44 | 1.24 (-1.41, 3.88)  | 0.36 |
| Tie2-expressing<br>CD14++CD16+,<br>% of CD14+ cells | 198 | 1.5 ± 1.1  | 1.7 ± 1.5  | -0.25 (-0.64, 0.14) | 0.21 | -0.29 (-0.69, 0.11) | 0.15 |

---

\*Beta coefficient (mean difference) adjusted for age and MELD-Na

vWF: von Willebrand factor, PBMCs: Peripheral blood mononuclear cells



**Table E3: Causes of death**

| Patient | Days from evaluation | Status | Cause of death                                             | Other causes of death                          |
|---------|----------------------|--------|------------------------------------------------------------|------------------------------------------------|
| 1       | 67                   | HPS    | Brain hematoma                                             |                                                |
| 2       | 537                  | HPS    | Sepsis/Septic shock                                        |                                                |
| 3       | 89                   | HPS    | Respiratory failure                                        |                                                |
| 4       | 510                  | HPS    | Hepatocellular carcinoma                                   |                                                |
| 5       | 226                  | HPS    | Unknown                                                    |                                                |
| 6       | 368                  | HPS    | Unknown                                                    |                                                |
| 7       | 775                  | HPS    | Cholangiocarcinoma                                         | Acute kidney injury                            |
| 8       | 209                  | HPS    | Unknown                                                    |                                                |
| 9       | 10                   | HPS    | Sepsis/Septic shock                                        |                                                |
| 10      | 817                  | HPS    | Unknown                                                    |                                                |
| 11      | 879                  | HPS    | Sudden cardiac arrest                                      |                                                |
| 12      | 45                   | HPS    | Disseminated intravascular coagulation                     | Haemorrhagic and septic shock                  |
| 13      | 210                  | HPS    | Liver failure                                              |                                                |
| 14      | 93                   | HPS    | Respiratory failure                                        |                                                |
| 15      | 527                  | HPS    | Brain embolism                                             |                                                |
| 16      | 418                  | HPS    | Liver failure                                              |                                                |
| 17      | 399                  | HPS    | Liver transplantation rejection                            |                                                |
| 18      | 612                  | HPS    | Respiratory failure                                        |                                                |
| 19      | 631                  | HPS    | Liver disease                                              |                                                |
| 20      | 942                  | HPS    | Liver disease                                              |                                                |
| 21      | 206                  | HPS    | Unknown                                                    |                                                |
| 22      | 170                  | HPS    | Multisystem organ failure                                  |                                                |
| 23      | 593                  | HPS    | Liver disease                                              |                                                |
| 24      | 220                  | HPS    | Hepatic and uremic encephalopathy                          |                                                |
| 25      | 605                  | No HPS | Unknown                                                    |                                                |
| 26      | 117                  | No HPS | Sepsis/Septic shock                                        |                                                |
| 27      | 499                  | No HPS | Liver disease                                              |                                                |
| 28      | 398                  | No HPS | Unknown                                                    |                                                |
| 29      | 245                  | No HPS | Acute renal failure                                        |                                                |
| 30      | 385                  | No HPS | Sudden cardiac arrest                                      |                                                |
| 31      | 1134                 | No HPS | <i>C. difficile</i> colitis                                | Sepsis/Septic shock, Multiorgan system failure |
| 32      | 162                  | No HPS | Unknown                                                    |                                                |
| 33      | 147                  | No HPS | Liver failure                                              |                                                |
| 34      | 950                  | No HPS | Sudden cardiac arrest during liver transplantation surgery |                                                |
| 35      | 481                  | No HPS | Sepsis/Septic shock                                        |                                                |
| 36      | 412                  | No HPS | Unknown                                                    |                                                |
| 37      | 42                   | No HPS | Haemorrhagic ascites                                       |                                                |

|    |      |        |                           |               |
|----|------|--------|---------------------------|---------------|
| 38 | 508  | No HPS | Multisystem organ failure |               |
| 39 | 462  | No HPS | Motor vehicle accident    |               |
| 40 | 103  | No HPS | Sepsis/Septic shock       |               |
| 41 | 511  | No HPS | Unknown                   |               |
| 42 | 515  | No HPS | Unknown                   |               |
| 43 | 206  | No HPS | Unknown                   |               |
| 44 | 83   | No HPS | Sepsis/Septic shock       |               |
| 45 | 1100 | No HPS | Acute alcoholic hepatitis |               |
| 46 | 325  | No HPS | Liver failure             |               |
| 47 | 90   | No HPS | Liver failure             |               |
| 48 | 390  | No HPS | Infection                 | Liver disease |
| 49 | 288  | No HPS | Unknown                   |               |

---

**Table E4: Survival analyses including patients with missing data for HPS phenotyping as “no HPS”**

| <b>Models</b>                                                                  | <b>HR (95% CI)</b> | <b>p value</b> | <b>aHR* (95% CI)</b> | <b>p value</b> | <b>E-value<br/>(lower band<br/>of 95% CI)</b> |
|--------------------------------------------------------------------------------|--------------------|----------------|----------------------|----------------|-----------------------------------------------|
| Overall survival                                                               | 1.51 (0.95, 2.42)  | 0.09           | 1.56 (0.97, 2.50)    | 0.07           | 2.06 (1.00)                                   |
| Overall survival with transplantation as a time-varying covariate              | 1.49 (0.93, 2.39)  | 0.09           | 1.47 (0.91, 2.35)    | 0.11           | 1.94 (1.00)                                   |
| Transplantation-free Survival                                                  | 1.51 (0.91, 2.49)  | 0.11           | 1.41 (0.85, 2.34)    | 0.2            | 1.85 (1.00)                                   |
| Survival with transplantation as competing risk (Fine-Gray model) <sup>†</sup> | 1.44 (0.90, 2.31)  | 0.13           | 1.43 (0.90, 2.29)    | 0.13           | 1.87 (1.00)                                   |
| Multistate model <sup>‡</sup>                                                  |                    |                |                      |                |                                               |
| Transition from waitlist to liver transplantation                              | 1.19 (0.82, 1.73)  | 0.37           | 1.33 (0.77, 1.64)    | 0.54           |                                               |
| Transition from waitlist to death without liver transplantation                | 1.51 (0.91, 2.49)  | 0.11           | 1.42 (0.85, 2.32)    | 0.18           | 1.87 (1.00)                                   |
| Transition from liver transplantation to death                                 | 1.44 (0.38, 5.41)  | 0.59           | 1.33 (0.34, 5.19)    | 0.68           |                                               |

\*Adjusted for age and MELD-Na score

<sup>†</sup>Subdistributional hazards ratio

<sup>‡</sup>Schema for the multistate model is shown in Figure E3

Figure E1: Selection of study sample

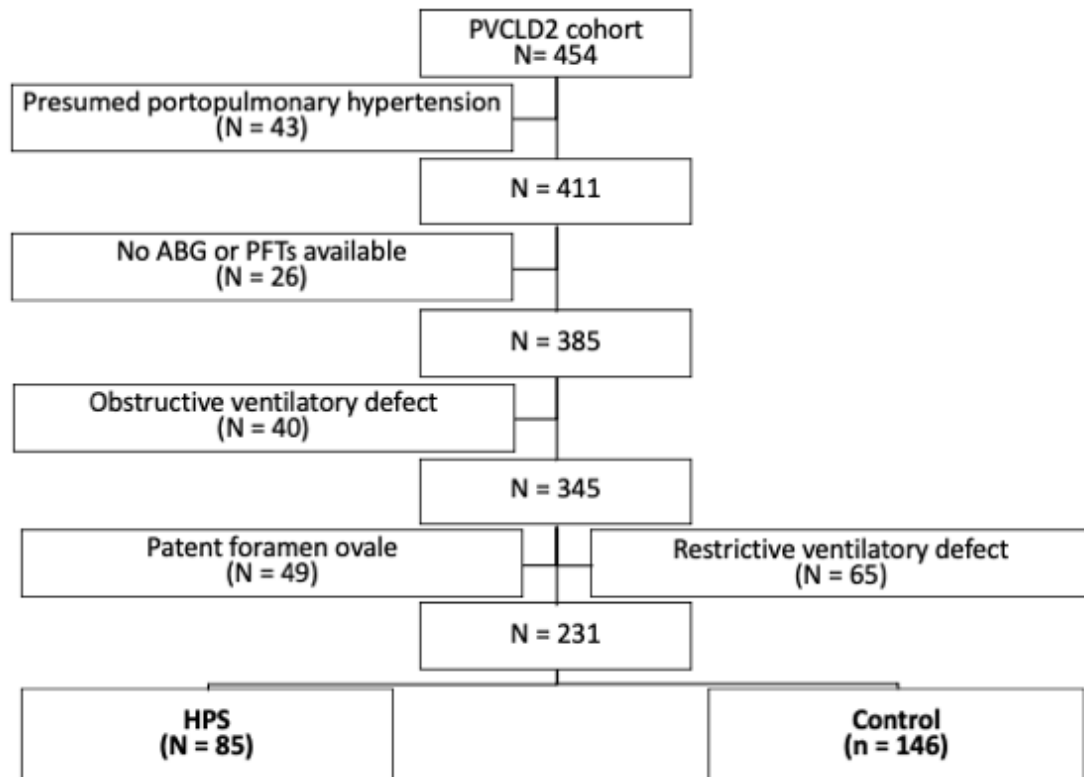

Figure E2: Time to liver transplantation

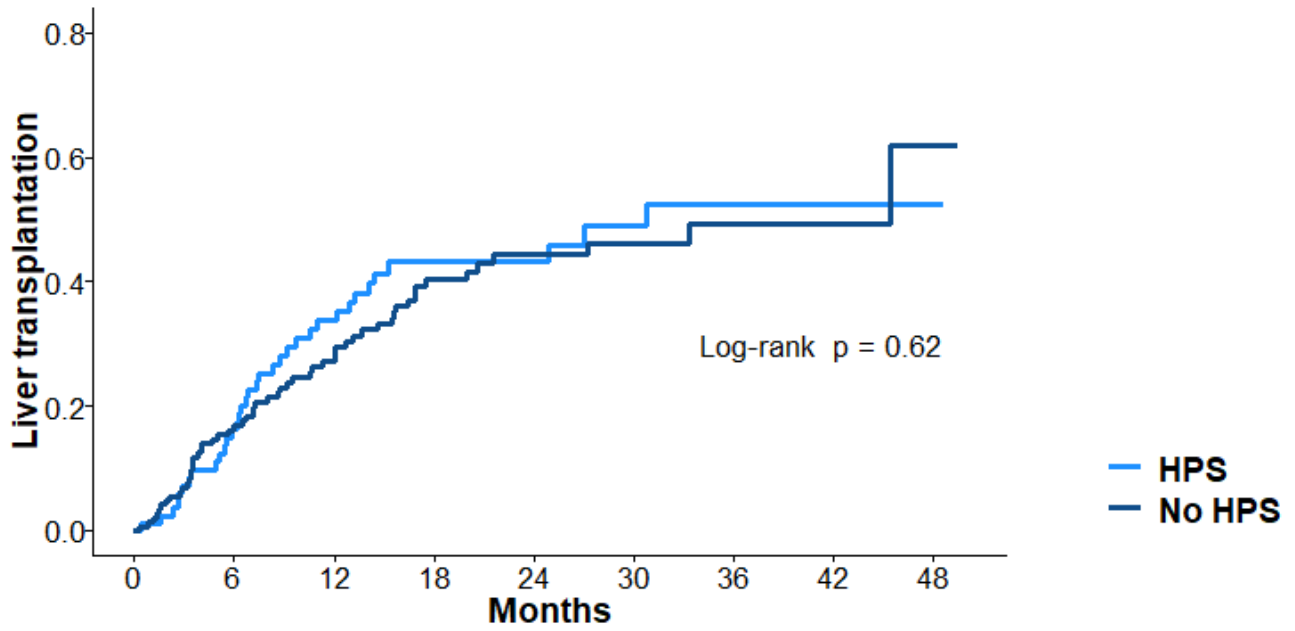

Number at risk

|   |     |     |    |    |    |    |    |   |   |
|---|-----|-----|----|----|----|----|----|---|---|
| — | 85  | 65  | 46 | 28 | 22 | 14 | 8  | 6 | 1 |
| — | 146 | 114 | 87 | 50 | 37 | 26 | 15 | 6 | 3 |

Figure E3: Mean cumulative function plot of hospitalizations from date of evaluation

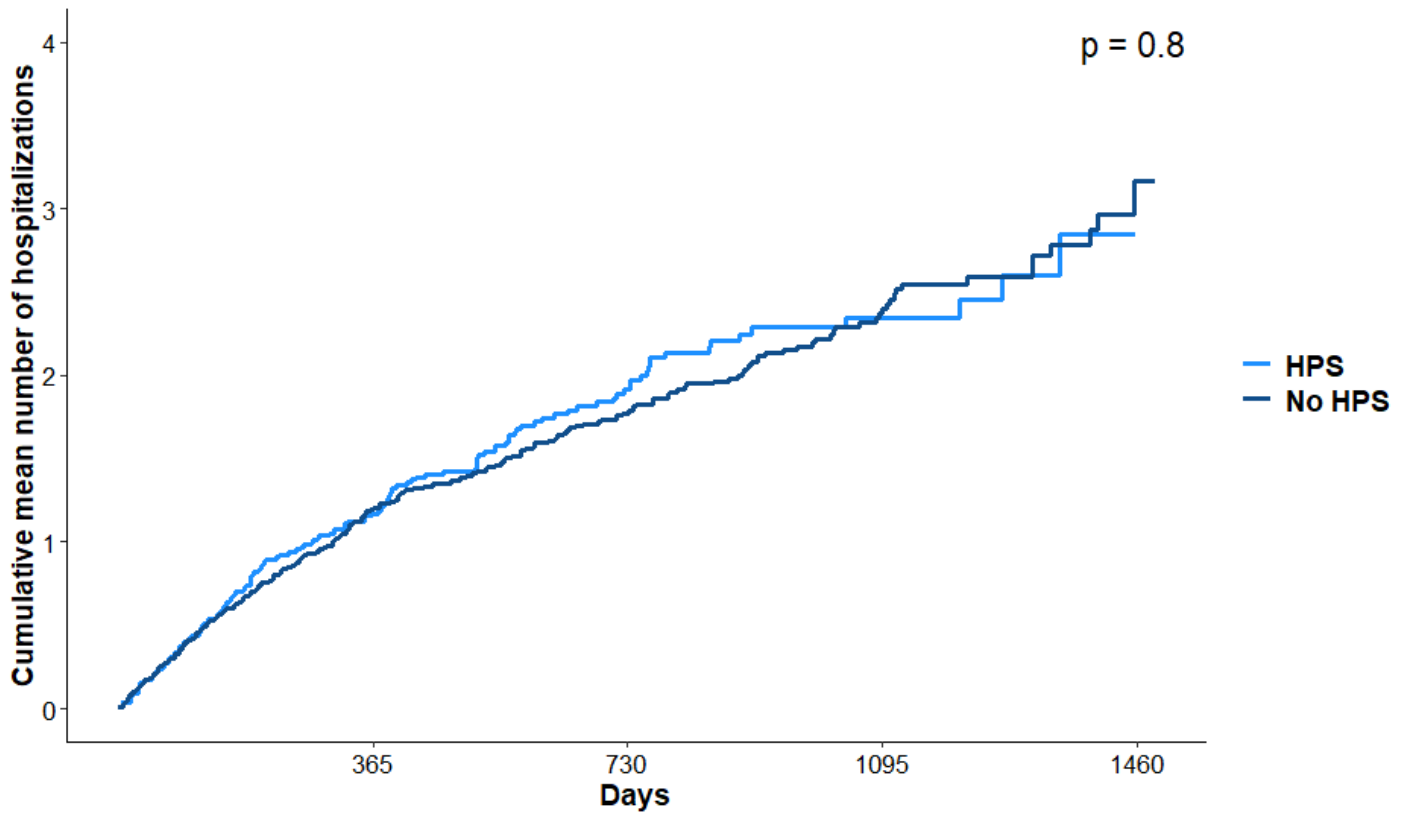

Figure E4: Hospitalizations in HPS and non-HPS groups

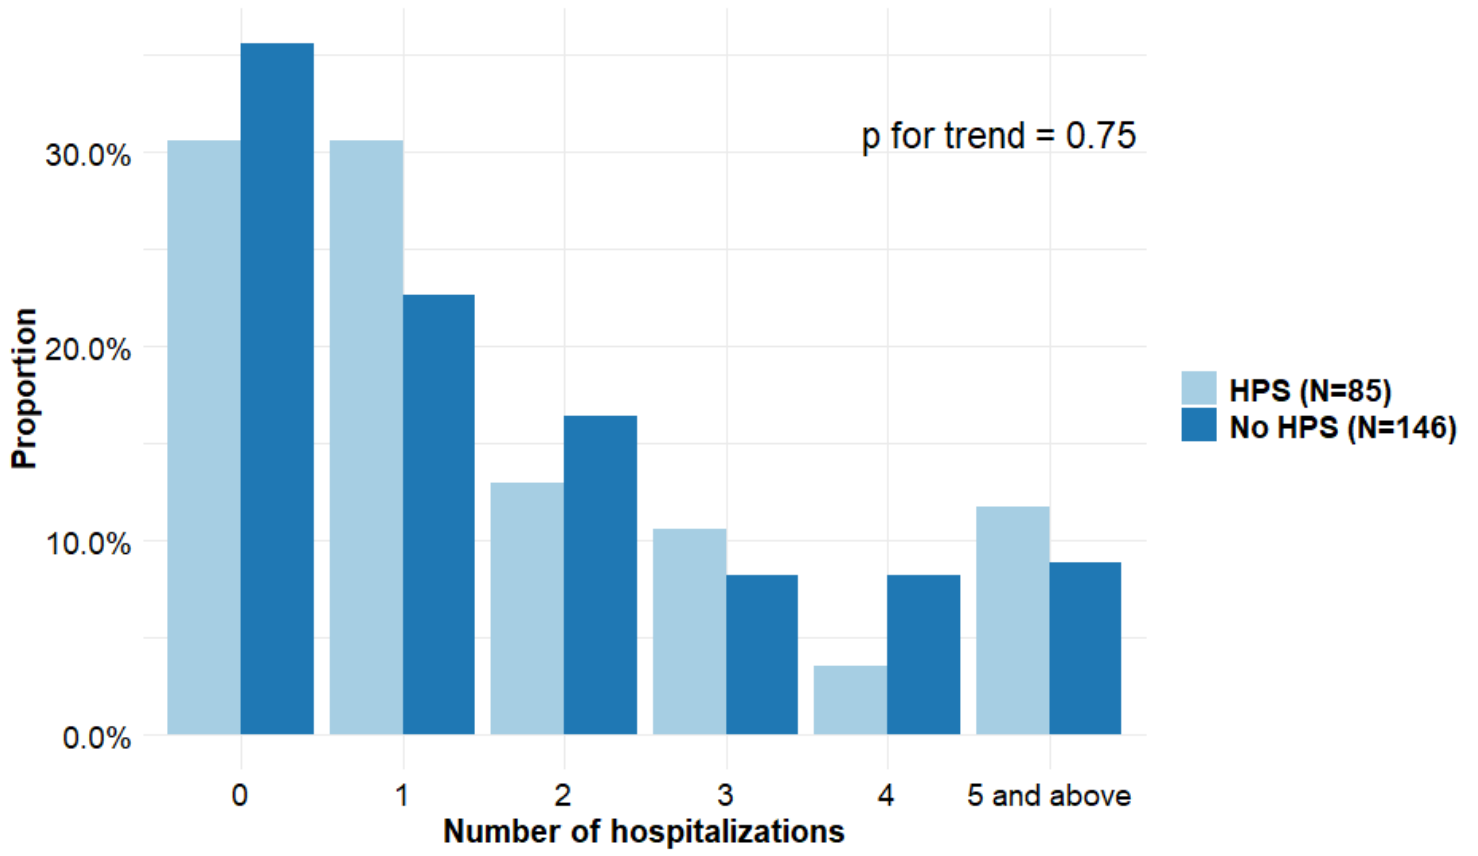

Figure E5: Schema for liver transplantation and death multistate model

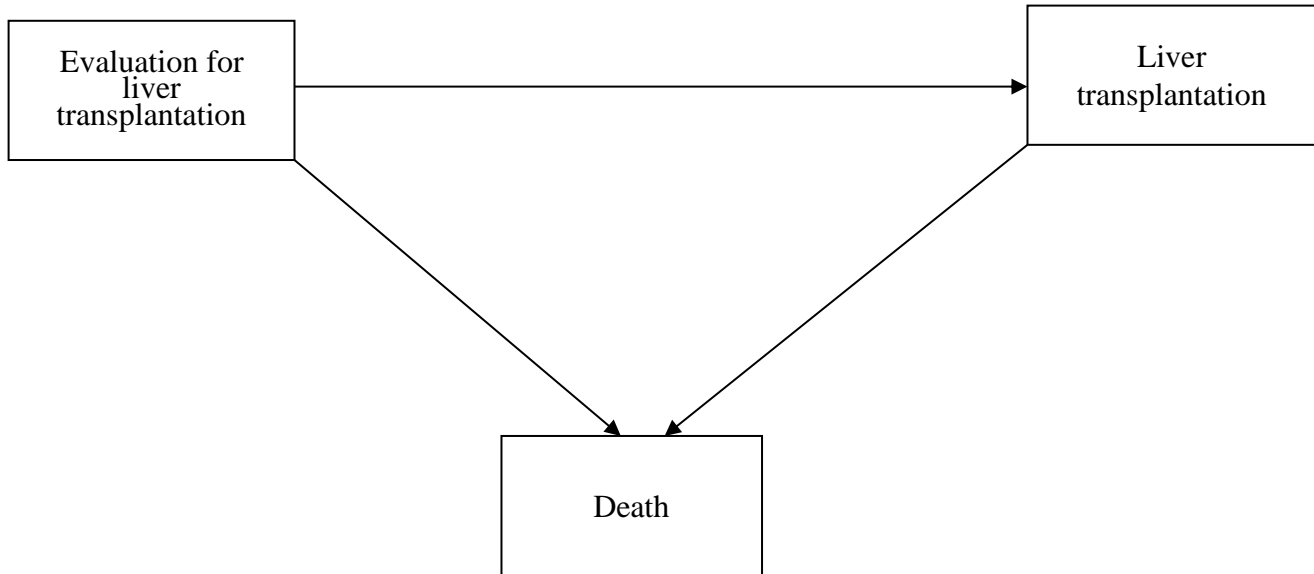



## References

1. Bartoli CR, Hennessy-Strahs S, Dowling RD, et al. Abnormalities in the Von Willebrand-Angiopoietin Axis Contribute to Dysregulated Angiogenesis and Angiodysplasia in Children With a Glenn Circulation. *JACC Basic Transl Sci* 2021;6:222-235.
2. Bartoli CR, Restle DJ, Zhang DM, et al. Pathologic von Willebrand factor degradation with a left ventricular assist device occurs via two distinct mechanisms: mechanical demolition and enzymatic cleavage. *J Thorac Cardiovasc Surg* 2015;149:281-9.
3. Bartoli CR, Zhang D, Kang J, et al. Clinical and In Vitro Evidence That Subclinical Hemolysis Contributes to LVAD Thrombosis. *Ann Thorac Surg* 2018;105:807-814.
4. Bartoli CR, Zhang DM, Hennessy-Strahs S, et al. Clinical and In Vitro Evidence That Left Ventricular Assist Device-Induced von Willebrand Factor Degradation Alters Angiogenesis. *Circ Heart Fail* 2018;11:e004638.
5. Hennessy-Strahs S, Bermudez CA, Acker MA, et al. Toward a Standard Practice to Quantify von Willebrand Factor Degradation During Left Ventricular Assist Device Support. *Ann Thorac Surg* 2020.
